# Supplementary material for: Iron Uptake Controls Trypanosoma cruzi Metabolic Shift and Cell Proliferation
Source: MDPI journal article supplement (doi:10.3390/antiox12050984), 2023-04-22
Supplement: s1 [file s1]

**Table S1.** Primers informations.

| Sequence name                                            | Accession number | E-value | r <sup>2</sup> |
|----------------------------------------------------------|------------------|---------|----------------|
| <i>T. cruzi</i> iron transporter                         | TCDM_06386       | 94.26%  | 0.9948         |
| <i>T. cruzi</i> ferric reductase                         | TCDM_07020       | 93.35%  | 0.9976         |
| <i>T. cruzi</i> heme-regulated inhibitor                 | TCDM_00579       | 95.43%  | 0.9992         |
| <i>T. cruzi</i> eukaryotic initiation factor 2 $\alpha$  | TCDM_00323       | 90.04%  | 0.9816         |
| <i>T. cruzi</i> protein kinase A                         | TCDM_05306       | 97.12%  | 0.9874         |
| <i>T. cruzi</i> glyceraldehyde-3-phosphate dehydrogenase | TCDM_02134       | 93.63%  | 0.998          |
| <i>T. cruzi</i> superoxide dismutase                     | TCDM_07362       | 92.93%  | 0.9987         |
| <i>T. cruzi</i> ascorbate peroxidase                     | TCDM_04015       | 93.29%  | 0.9875         |
| <i>T. cruzi</i> beta tubulin                             | BCY84_1376       | 93.73%  | 0.9816         |
